# Supplementary material for: A novel approach for the synthesis of hydrogel nanoparticles and a removal study of reactive dyes from industrial effluent
Source: Royal Society of Chemistry journal article supplement (doi:10.1039/c5ra19441e), 2016-01-01
Supplement: c5ra19441e1.xlsx [file c5ra19441e1.xlsx]

## Sheet: Dye removal adsorption data
Single Dye Removal Adsorption data: 1. Effect of Treatment Time
				Reactive Red 152
Binding Ratio of Nanohydrogel VUV-05				Wavelength=520nm	Binding ratio Q = (C0-C/m)*V
250 PPM Sol. V=	0.050Lit				where V=volume of dye solution in liter=0.05lit
					%Removal = ((C0-C)/C0)*100
No.	original solution ppm	solution preparation	final conc. In ppm	absorbance of the final conc. Solution	con found from calibration curve	conc. of original solution
1	200	5ml of 50	20	0.384	19.5768	195.768
Sr. No.	initial con.	Abs. before equilibrium	Time (h)	Abs. after equilibrium	conc. Before equilibrium	conc. after equilibrium	wt. of hydrogel	Binding ratio	% Removal
1	4	0.112	0.5	2.198		116.96	0.025	353.384	60.1706
2	8	0.18	1	1.624		86.1449	0.025	415.013	70.6642
3	12	0.248	1.5	1.121	293.651	59.1419	0.025	469.019	79.8598
4	16	0.31	2	0.712		37.1851	0.025	512.932	87.337
5	20	0.384	3	0.692		36.1114	0.025	515.08	87.7026
6			4	0.672		35.0377	0.025	517.227	88.0682
calibration curve equatation
	C=K*ABS+B	where K=	53.684
		B=	-1.0379
						Fig. 12 The effect of treatment time on dye adsorption
Single Dye Removal Adsorption data: 2. Effect of initial dye concentration
Binding Ratio of Nanohydrogel VUV-05
			Reactive Red 152
			Wavelength=520 nm
200 PPM solution=0.050 Lit
No.	original solution ppm	solution preparation	final conc. In ppm	abs. of the final conc. Solution	con found from calibration curve	conc. of original solution
1	200	5ml of 50	20	0.384	19.5768	195.768
Sr. No.	initial con.	Absorbance	Dye Solutiion (PPM)	conc. Before equilibrium	Absorption before equilibrim	Abs. after equilibrium	conc. after equilibrium	wt. of hydrogel	Binding ratio	% Removal	1/qe	1/Ce	log qe	log ce
1	4	0.112	50	48.9419	0.96	0.08	3.25682	0.025	91.3701	93.3455	0.0109445	0.307048	1.9608	0.512794
2	8	0.18	100	97.8838	1.92	0.168	7.98101	0.025	179.806	91.8464	0.00556156	0.125297	2.2548	0.902058
3	12	0.248	150	146.826	2.88	0.243	12.0073	0.025	269.637	91.8221	0.00370869	0.0832826	2.43078	1.07945
4	16	0.31	200	195.768	3.84	0.348	17.6441	0.025	356.247	90.9872	0.00280704	0.0566761	2.55175	1.2466
5	20	0.384	250	244.709	4.8	0.498	25.6967	0.025	438.025	89.4991	0.00228297	0.0389155	2.6415	1.40988
6			300	293.651	5.76	0.701	36.5946	0.025	514.114	87.5381	0.0019451	0.0273264	2.71106	1.56342
calibration curve equatation
	C=K*ABS+B	where K=	53.684
		B=	-1.0379
Langmuir Isotherm
Slope=1/qo b	b=1/slope*q0
intercept=1/q0	q0=1/intercept				Fig. 13 The effect of initial dye concentrations on dye adsorption
Intercept	0.0011
Slope	0.0325
		q0	b	R2
		909.091	0.0338462	0.9956
Freundlich Isotherm
Slope=1/n	n=1/slope
Intercept=log Kf	Kf=ln*Int
Intercept	1.6039
Slope	0.7339
		Kf	n	R2
		0.472438	1.36258	0.9858
Single Dye Removal Adsorption data: 3. Effect of pH
Binding Ratio of Nanohydrogel VUV-05
			Reactive Red 152
			Wavelength=520 nm
300 PPM solution=0.050 Lit
No.	original solution ppm	solution preparation	final conc. In ppm	abs. of the final conc. Solution	con found from calibration curve	conc. of original solution
1	200	5ml of 50	20	0.384	19.5768	195.768
Sr. No.	initial con.	Absorbance	pH	Dye Solutiion (PPM)	conc. Before equilibrium	Absorption before equilibrim	Abs. after equilibrium	conc. after equilibrium	wt. of hydrogel	Binding ratio	% Removal
1	4	0.112	2				0.52	26.8778	0.025	533.547	90.847
2	8	0.18	4				0.618	32.1388	0.025	523.025	89.0555
3	12	0.248	6	300	293.651	5.76	0.598	31.0651	0.025	525.172	89.4211
4	16	0.31	8				0.643	33.4809	0.025	520.341	88.5984
5	20	0.384	10				0.6	31.1725	0.025	524.958	89.3845
6			12				0.2	9.6989	0.025	567.905	96.6971
calibration curve equatation
	C=K*ABS+B	where K=	53.684
		B=	-1.0379
					Fig. 14 The effect of pH on dyes adsorption
Single Dye Removal Adsorption data: 4. Effect of adsorbent dose
Binding Ratio of Nanohydrogel VUV-05
				Reactive Red 152
				Wavelength=520 nm
250 PPM Sol. V=	0.050Lit
Sr. No.	original solution ppm	solution preparation	final conc. In ppm	absorbance of the final conc. Solution	con found from calibration curve	conc. of original solution
1	200	5ml of 50	20	0.384	19.5768	195.768
Sr. No.	initial con.	Abs. before equilibrium	Time	Abs. after equilibrium	conc. Before equilibrium	conc. after equilibrium	wt. of hydrogel	Binding ratio	% Removal
1	4	0.112		2.312		123.08	0.01	852.859	58.0865
2	8	0.18		1.324		70.0397	0.02	559.029	76.1487
3	12	0.248	2h	0.685	293.651	35.7356	0.03	429.86	87.8306
4	16	0.31		0.632		32.8904	0.04	325.951	88.7995
5	20	0.384		0.564		29.2399	0.05	264.411	90.0427
calibration curve equatation
	C=K*ABS+B	where K=	53.684
		B=	-1.0379
					Fig. 15 The effect of adsorbent dose on dyes adsorption
Mixture of Dyes Removal Adsorption data: 1. Effect of Treatment Time
Binding Ratio of Nanohydrogel VUV-05
		Dyes Effluent
				Reactive Blue 222: Wavelength=615 nm
30 solution=0.050 Lit				Reactive Black 5: Wavelength=597 nm	Binding ratio Q = (C0-C/m)*V
				Reactive Red 195: Wavelength=542 nm	where V=volume of dye solution in liter=0.05lit
					%Removal = ((C0-C)/C0)*100
Dye Name	Sr. No.	Original Solution	Absorbance
RB-222	1	0.05	0.439
RB-5	2	0.05	0.502
RR-195	3	0.05	0.578
Reactive Blue 222=615 nm
Sr. No.	Sample code	Time (h)	Absorbance before equilibrium	Absorbance After equilibrium	Wt.of Hydrogel	unreacted	Removal efficieny
1		0.5		1.923	0.025	73.0068	26.9932
2		1		1.645	0.025	62.4525	37.5475
3		1.5		1.398	0.025	53.0752	46.9248
4	F	2	2.634	1.245	0.025	47.2665	52.7335
5		3		1.205	0.025	45.7479	54.2521
6		4		1.178	0.025	44.7229	55.2771
Reactive Black 5=597 nm
Sr. No.	Sample code	Time (h)	Absorbance before equilibrium	Absorbance After equilibrium	Wt.of Hydrogel	unreacted	Removal efficieny
1		0.5		2.286	0.025	75.8964	24.1036
2		1		1.954	0.025	64.8738	35.1262
3		1.5		1.625	0.025	53.9509	46.0491
4	F	2	3.012	1.448	0.025	48.0744	51.9256
5		3		1.398	0.025	46.4143	53.5857
6		4		1.356	0.025	45.0199	54.9801
Reactive Red 195=542 nm
Sr. No.	Sample code	Time (h)	Absorbance before equilibrium	Absorbance After equilibrium	Wt.of Hydrogel	unreacted	Removal efficieny
1		0.5		2.456	0.025	70.8189	29.1811
2		1		2.056	0.025	59.2849	40.7151
3		1.5		1.779	0.025	51.2976	48.7024
4	F	2	3.468	1.602	0.025	46.1938	53.8062
5		3		1.574	0.025	45.3864	54.6136
6		4		1.512	0.025	43.5986	56.4014
Mixture of Dyes Removal Adsorption data: 2. Effect of initial dye concentration
Binding Ratio of Nanohydrogel VUV-05
		Dyes Effluent
30 solution=0.050 Lit
Dye Name	Sr. No.	Original Solution	Absorbance
RB-222	1	0.05	0.439
RB-5	2	0.05	0.502
RR-195	3	0.05	0.578
Reactive Blue 222=615 nm
Sr. No.	Sample code	Original dye Solution	Absorbance before equilibrium	Absorbance After equilibrium	Wt.of Hydrogel	unreacted	Removal efficieny
1	A	0.05	0.439	0.039	0.025	8.88383	91.1162
2	B	0.1	0.878	0.041	0.025	4.6697	95.3303
3	C	0.15	1.317	0.068	0.025	5.16325	94.8368
4	D	0.2	1.756	0.571	0.025	32.5171	67.4829
5	E	0.25	2.195	0.815	0.025	37.1298	62.8702
6	F	0.3	2.634	1.267	0.025	48.1017	51.8983
7	G	0.4	3.512	1.95	0.025	55.5239	44.4761
Reactive Black 5=597 nm
Sr. No.	Sample code	Original dye Solution	Absorbance before equilibrium	Absorbance After equilibrium	Wt.of Hydrogel	unreacted	Removal efficieny
1	A	0.05	0.502	0.039	0.025	7.76892	92.2311
2	B	0.1	1.004	0.043	0.025	4.28287	95.7171
3	C	0.15	1.506	0.073	0.025	4.84728	95.1527
4	D	0.2	2.008	0.669	0.025	33.3167	66.6833
5	E	0.25	2.51	0.947	0.025	37.7291	62.2709
6	F	0.3	3.012	1.474	0.025	48.9376	51.0624
7	G	0.4	4.016	2.246	0.025	55.9263	44.0737
Reactive Red 195=542 nm
Sr. No.	Sample code	Original dye Solution	Absorbance before equilibrium	Absorbance After equilibrium	Wt.of Hydrogel	unreacted	Removal efficieny
1	A	0.05	0.578	0.039	0.025	6.7474	93.2526
2	B	0.1	1.156	0.047	0.025	4.06574	95.9343
3	C	0.15	1.734	0.087	0.025	5.0173	94.9827
4	D	0.2	2.312	0.751	0.025	32.4827	67.5173
5	E	0.25	2.89	1.059	0.025	36.6436	63.3564
6	F	0.3	3.468	1.625	0.025	46.857	53.143
7	G	0.4	4.624	2.391	0.025	51.7085	48.2915
Mixture of Dyes Removal Adsorption data: 3. Effect of pH
Binding Ratio of Nanohydrogel VUV 05
		Dyes Effluent
30 solution=0.050 Lit
Dye Name	Sr. No.	Original Solution	Absorbance
RB-222	1	0.05	0.439
RB-5	2	0.05	0.502
RR-195	3	0.05	0.578
Reactive Blue 222=615 nm
Sr. No.	Sample code	pH of dye effluent	Absorbance before equilibrium	Absorbance After equilibrium	unreacted	Removal efficieny
1		2		0.823	31.2453	68.7547
2		4		1.119	42.4829	57.5171
3	F	6	2.634	0.913	34.6621	65.3379
4		8		0.929	35.2696	64.7304
5		10		0.767	29.1192	70.8808
6		12		0.298	11.3136	88.6864
Reactive Black 5=597 nm
Sr. No.	Sample code	pH of dye effluent	Absorbance before equilibrium	Absorbance After equilibrium	unreacted	Removal efficieny
1		2		0.75	24.9004	75.0996
2		4		1.236	41.0359	58.9641
3	F	6	3.012	1.07	35.5246	64.4754
4		8		1.091	36.2218	63.7782
5		10		0.886	29.4157	70.5843
6		12		0.338	11.2218	88.7782
Reactive Red 195=542 nm
Sr. No.	Sample code	pH of dye effluent	Absorbance before equilibrium	Absorbance After equilibrium	unreacted	Removal efficieny
1		2		0.859	24.7693	75.2307
2		4		1.26	36.3322	63.6678
3	F	6	3.468	1.241	35.7843	64.2157
4		8		1.292	37.2549	62.7451
5		10		1.019	29.3829	70.6171
6		12		0.355	10.2364	89.7636
Mixture of Dyes Removal Adsorption data: 4. Effect of adsorbent dose
Binding Ratio of Nanohydrogel VUV 05
		Dyes Effluent
30 solution=0.050 Lit
Dye Name	Sr. No.	Original Solution	Absorbance
RB-222	1	0.05	0.439
RB-5	2	0.05	0.502
RR-195	3	0.05	0.578
Reactive Blue 222=615 nm
Sr. No.	Sample code	Adsorbent dose (g)	Absorbance before equilibrium	Absorbance After equilibrium	unreacted	Removal efficieny
1		0.01		1.879	71.3364	28.6636
2		0.02		1.54	58.4662	41.5338
3	F	0.03	2.634	0.75	28.4738	71.5262
4		0.04		0.659	25.019	74.981
5		0.05		0.287	10.896	89.104
Reactive Black 5=597 nm
Sr. No.	Sample code	Adsorbent dose (g)	Absorbance before equilibrium	Absorbance After equilibrium	unreacted	Removal efficieny
1		0.01		2.177	72.2776	27.7224
2		0.02		1.79	59.429	40.571
3	F	0.03	3.012	0.886	29.4157	70.5843
4		0.04		0.782	25.9628	74.0372
5		0.05		0.344	11.421	88.579
Reactive Red 195=542 nm
Sr. No.	Sample code	Adsorbent dose (g)	Absorbance before equilibrium	Absorbance After equilibrium	unreacted	Removal efficieny
1		0.01		2.325	67.0415	32.9585
2		0.02		1.968	56.7474	43.2526
3	F	0.03	3.468	1.026	29.5848	70.4152
4		0.04		0.917	26.4418	73.5582
5		0.05		0.436	12.5721	87.4279

## Sheet: Table
Sr. No.	Time	C	Qe	Removal efficiency (%)
1	2	112.196	272.03	554.798
2	4	105.028	286.364	57.6857
3	8	99.4272	297.567	59.9424
4	16	94.6069	307.203	61.8836
5	24	56.1233	384.174	77.3888
6	36	52.8108	390.799	78.7234
7	48	50.3715	395.678	79.7061
